# Supplementary material
Source: PubMed Central journal article supplement (PMC7687943)
Supplement: boe-11-11-6721-s001.pdf [file boe-11-11-6721-s001.pdf]

## ***In vivo* intravascular photoacoustic imaging at a high speed of 100 frames per second: supplement**

**ZHIHUA XIE,<sup>1,2,6</sup> CHENGYOU SHU,<sup>1,2,6</sup> DAYA YANG,<sup>3,4,6</sup> HAO CHEN,<sup>1</sup> CHAOBIN CHEN,<sup>1</sup> GANG DAI,<sup>3,4</sup> KWOK HO LAM,<sup>5</sup> JINKE ZHANG,<sup>1,2</sup> XIATIAN WANG,<sup>1</sup> ZONGHAI SHENG,<sup>1,2</sup> DUYANG GAO,<sup>1,2</sup> CHENGBO LIU,<sup>1,2</sup>  LIANG SONG,<sup>1,2,7</sup> AND XIAOJING GONG<sup>1,2,8</sup>**

<sup>1</sup>Research Laboratory for Biomedical Optics and Molecular imaging, Shenzhen Institutes of Advanced Technology, Chinese Academy of Sciences, Shenzhen 518055, China

<sup>2</sup>Research Laboratory for Biomedical Optics and Molecular Imaging, Shenzhen Key Laboratory for Molecular Imaging, Guangdong Provincial Key Laboratory of Biomedical Optical Imaging Technology, CAS Key Laboratory of Health Informatics, Shenzhen Institutes of Advanced Technology, Shenzhen 518055, China

<sup>3</sup>Department of Cardiology, The First Affiliated Hospital, Sun Yat-sen University, Guangzhou 510080, China

<sup>4</sup>Key Laboratory of Assisted Circulation, National Health Commission, Sun Yat-sen University, Guangzhou 510080, China

<sup>5</sup>Department of Electrical Engineering, The Hong Kong Polytechnic University, Hunghom, Hong Kong

<sup>6</sup>Equal contribution

<sup>7</sup>liang.song@siat.ac.cn

<sup>8</sup>xj.gong@siat.ac.cn

---

This supplement published with The Optical Society on 27 October 2020 by The Authors under the terms of the [Creative Commons Attribution 4.0 License](https://creativecommons.org/licenses/by/4.0/) in the format provided by the authors and unedited. Further distribution of this work must maintain attribution to the author(s) and the published article's title, journal citation, and DOI.

Supplement DOI: <https://doi.org/10.6084/m9.figshare.13047896>

Parent Article DOI: <https://doi.org/10.1364/BOE.405792>

## ***In vivo* intravascular photoacoustic imaging at high speed of 100 frame/second**

Zihua Xie, Chengyou Shu, Daya Yang, Hao Chen, Chaobin Chen, Gang Dai, Kwok Ho Lam, Jinke Zhang, Xiatian Wang, Zonghai Sheng, Duyang Gao, Chengbo Liu, Liang Song, and Xiaojing Gong

The *in vivo* intravascular imaging results using the rabbit atherosclerotic plaque models and PBD-CD36 nanoparticles. The information of the PBD-CD36 has been reported in the reference of "Theranostics **10**, 4694-4704 (2020)"

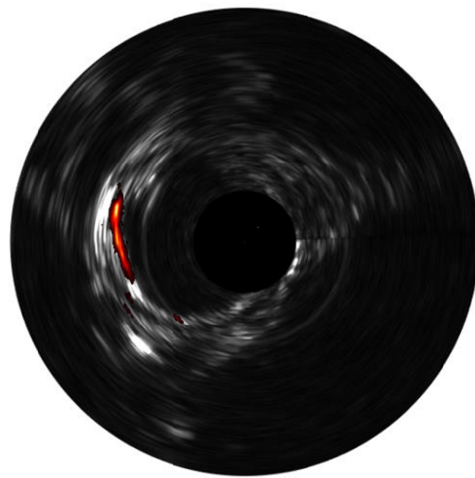

Fig. S1: The fused IVPA/IVUS image obtained in the high speed *in vivo* imaging with the imaging speed as high as 100 frames/second. The grey image is the IVUS imaging, offering the anatomical structure of the artery wall; the signal in hot is the photoacoustic signal obtained from the PBD-CD36 particles injected in the artery wall.
